# Supplementary material for: The Efficacy of Food Bioactive Compounds in The Treatment of Non-Alcoholic Fatty Liver Disease: A Systematic Review and Meta-Analysis
Source: Preprints.org preprint supplement (doi:10.20944/preprints202410.0208.v1), 2024-10-02
Supplement: Supplementary file 1 [file supplementary]

## Sheet: General DE
TABLE 1											BASELINE PARAMETERS																		POST TREATMENT PARAMETERS
Study	DOI	Age_Placebo	Age_Treatment	Type of Study	Placebo (n)	Treatment (n)	ChemX_Placebo	ChemX_Treatment	Intervention		Resp_BMI (Placebo)	Resp_BMI (treatment)	Resp_WC (Placebo)	Resp_WC (treatment)	Resp_HOMA-IR (Placebo)	Resp_HOMA-IR (treatment)	Resp_LDL (Placebo)	Resp_LDL (treatment)	Resp_HDL (Placebo)	Resp_HDL (treatment)	Resp_ALT (Placebo)	Resp_ALT (treatment)	Resp_AST (Placebo)	Resp_AST (treatment)	Resp_TLG (Placebo)	Resp_TLG (treatment)	Resp_TChol (Placebo)	Resp_TChol (treatment)	Resp_BMI (Placebo)	Resp_BMI (treatment)	Resp_WC (Placebo)	Resp_WC (treatment)	Resp_HOMA-IR (Placebo)	Resp_HOMA-IR (treatment)	Resp_LDL (Placebo)	Resp_LDL (treatment)	Resp_HDL (Placebo)	Resp_HDL (treatment)	Resp_ALT (Placebo)	Resp_ALT (treatment)	Resp_AST (Placebo)	Resp_AST (treatment)	Resp_TLG (Placebo)	Resp_TLG (treatment)	Resp_TChol (Placebo)	Resp_TChol (treatment)
Abenavoli et al 2015	10.1586/17474124.2015.1004312	33 (28–44)	46 (36–59)	RCT	10	10	No treatment	silybin–vitamin E–phospholipidcomplex	Silybin	median–IQR	29 (27–32)	29 (28–32)	102 (97–111)	104 (100–105)	1.9 (1–3.3)	4 (3–6)	113 (96–130)	122 (97–134)	45 (36–53)	47 (35–52)	29 (23–61)	23 (21–40)	25 (22–32)	22 (20–25	136 (115–179)	103 (84–154)	170 (145–189)	198 (171–213)	29 (27–31)	27 (25–28)	102 (98–111)	98 (96–100)	2.6 (1.8–4)	2 (1–3)	67 (53–96)	95 (75–120)	46 (42–49)	38 (37–45)	40 (31–54)	25 (17–25)	29 (23–60)	21 (18–32)	142 (136–176)	65 (60–92)	194 (150–216)	152 (140–180)
Afsharinasab et al., 2020	https://doi.org/10.1016/j.sjbs.2020.04.037	34.9±8.69	33.52±6.67	RCT	21	21	Cellulose 750 mg	Extract of Berberis integerrima (750mg)	Berberis Integerrima		26.66±2.91	25.85±2.63	96.85 ± 8.36	93.41 ± 5.3	NA	NA	122.35 ± 21.73	133.05 ± 20.11	44.90 ± 4.62	46.38 ± 5.06	54.55 ± 9.81	54.52 ± 10.31	52.35 ± 9.89	52.95 ± 10.04	233.05 ± 61.74	224.43 ± 83.90	277.15 ± 48.54	250.19 ± 51.68	26.54 ± 2.82	25.48 ± 2.56	96.10 ± 8.25	91.57 ± 5.2	NA	NA	115.35 ± 20.47	12.33 ± 15.13	46.70 ± 10.86	54.81 ± 4.80	46.15 ± 7.31	39.38 ± 5.32	45.85 ± 7.74	37.81 ± 5.34	223.05 ± 48.01	194.62 ± 60.51	216.25 ± 41.7	205.62 ± 45.01
Amerikanou et al., 2021	DOI: 10.1002/mnfr.202001178	48.95 (9.04)	48.66 (9.89)	RCT	57	41	placebo capsules	Mastiha	Mastiha	mean ± S	34.66 (5.05)	34.14 (3.38)	NA	NA	4.83 (2.69)	4.95 (2.52)	129.69 (37.31)	123.65 (30.75)	44.31 (9.91)	44.75 (11.04)	36.7 (21.67)	39.33 (18.71)	24.39 (11.72)	26.59 (10.19)	141.96 59.35)	156.91 (72.15)	202.91 (37.61)	200.14 (37.59)	NA	NA	NA	NA	NA	NA	NA	NA	NA	NA	NA	NA	NA	NA	NA	NA	NA	NA
Anushiravani et al., 2019	DOI: 10.1097/MEG.0000000000001369	NA	NA	RCT	30	30	Lifestyle plus placebo	silymarin 140 mg/day	Silymarin		26.1 ± 3.1	25.1 ± 3.7	92.8 ± 8.9	90.6 ± 10.5	NA	NA	131.2 ± 48.8	113.7 ± 34.3	58.4 ± 8.6	48.5 ± 9.1	22.8 ± 15.9	30.2 ± 18.1	19.6 ± 11.7	23.3 ± 11.1	150.2 ± 54.2	155.1 ± 83.7	219.6 ± 55.4	193.2 ± 39.9	25.4 ± 2.6	24.4 ± 3.2	91.6 ± 8.2	89.8 ± 9.7	NA	NA	130.6 ± 37.3	112.5 ± 33.7	58.1 ± 6.3	49.4 ± 8.1	22.2 ± 12.8	21.6 ± 11.7	18.7 ± 9.4	16.6 ± 6.1	143.7 ± 41.8	144.8 ± 65.6	212.6 ± 47.9	191.2 ± 38.1
Asghari et al., 2018	ttps://doi.org/10.1080/07315724.2017.1392264	39.27 (5.51)	39.80 (7.74)	RCT	30	30	2 placebo capsules	600 mg pure trans-resveratrol	Resveratrol	mean ± S	30.41 (3.39)	30.78 (3.10)	101.88 (8.18)	102.78 (7.57)	1.27 (0.04, 4.25)	1.38 (0.04, 6.77)	135.75 (31.42)	137.59 (36.42)	39.69 (6.78)	37.60 (9.72)	33.71 (20.36)	41.48 (23.60)	29.85 (9.80)	31.04 (11.12)	159.98 (86.91)	172.44 (95.52)	207.44 (36.62)	209.68 (41.58)	30.40 (3.33)	30.44 (3.14)	101.10 (8.21)	101.64 (7.82)	1.40 (0.04, 14.44)	1.11 (0.04, 8.34)	139.41 (32.12)	144.60 (35.23)	37.69 (8.55)	37.12 (11.28)	40.94 (28.81)	46.20 (25.19)	34.27 (21.06)	32.52 (11.19)	171.46 (97.38)	179.16 (111.38)	211.39 (34.48)	217.56 (40.40)
Asghari et al., 2018	doi: 10.15171/apb.2018.036	38.50 (30, 48)	40.00 (22, 58)	RCT	26	25	placebo capsules	2×300 mg pure trans-resveratrol capsules	Resveratrol		30.41 (3.39)	30.78 (3.10)	NA	NA	NA	NA	NA	NA	NA	NA	NA	NA	NA	NA	NA	NA	NA	NA	NA	NA	NA	NA	NA	NA	NA	NA	NA	NA	NA	NA	NA	NA	NA	NA	NA	NA
ByoungduckHAN et al., 2020	https://doi.org/10.7762/cnr.2020.9.4.258	49.20 ± 12.94	48.00 ± 12.63	RCT	41	38	placebo capsules	SPB-201 (powdered-water extract of Artemisia annua	Artemisia	Mean ± SD for BMI, Mean Difference, % Change for Tchol	27.53 ± 4.26	26.65 ± 3.87	NA	NA	NA	NA	NA	NA	NA	NA	NA	NA	NA	NA	NA	NA	NA	NA	NA	NA	NA	NA	NA	NA	0.02 ± 21.08 mg/dL	-'(6.03 ± 23.1)	NA	NA	-'(7.41 ± 15.90 U/L)	-'(15.97 ± 18.82 U/L)	-'(5.71 ± 12.71 U/L)	-'(11.39 ± 13.58 U/L)	NA	NA	NA	-'20%
Chan et al., 2017	10.1016/j.cgh.2017.04.016	50.1 ± 10.2	49.6 ± 12.7	RCT	49	50	placebo capsules	silymarin (700 mg)	Silymarin		31.0 ± 4.6	30.0 ± 4.0	101 ± 11	99 ± 11	6.3 (4.3 – 10.0)	5.8 (3.6 – 10.0)	2.81 (2.34 – 3.57)	3.15 (2.48 – 4.08)	1.13 (0.96 – 1.36)	1.18 (0.99 – 1.34)	73 (47 – 121)	88 (60 – 132)	46 (31 – 70)	52 (36 – 78)	1.30 (1.10 – 1.93) mmol/L	1.70 (1.50 – 2.10) mmol/L	4.60 (4.18 – 5.43 mmol/L	5.10 (4.60 – 6.05) mmol/L	NA	NA	NA	NA	0.6	0.5	-0.17	-0.31	0.02	0.07	-21	-20	-6	-13	0.04	-'0.2	-0.09	-0.33
Chen et al 2015	http://dx.doi.org/10.1016/j.dld.2014.11.015	43.5 ± 11	45.2 ± 10	RCT	30	30	2 placebo capsules	Two 150 mg resveratrol capsules	Resveratrol		26.2 ± 3.08	25.3 ± 2.11	88.2 ± 7.10	88.4 ± 7.01	3.16 ± 1.22	3.26 ± 1.36	2.95±0.68mmol/L	3.08±0.48mmol/L	1.26±0.25mmol/L	1.26±0.22mmol/L	34.5 (27.8, 47.0)	39 (33.8, 49.3)	27.5 (24.8, 33.0)	29.0 (26.0, 33.5)	NA	NA	5.39±0.78mmol/L	5.39±0.75mmol/L	0.17±0.86	"-" 0.01 ± 0.54	0.35±4.99	1.18±4.76	0.09 ± 1.37	"-"0.6 ± 1.15	0.08±0.71mmol/L	-' 0.41±0.35mmol/L	-' 0.02±0.41mmol/L	0.04±0.36mmol/L	"-"1 (-8.00, 4.50)	"-"7 (-11.00, 2.50)	"-"0.5 (-4.50, 2.25)	"-"6 (-9, -3)	NA	NA	"-"0.15 ± 0.77mmol/L	"-"0.67 ± 0.50mmol/L
Cheng et al., 2019	10.1002/aid2.13125	59 ± 10.5	55 ± 12.5	RCT	20	20	placebo capsules	fucoidan-fucoxanthin mixture (275 mg LMF and 275 mg HSFx)	fucoidan-fucoxanthin		27.5 ± 4.0	28.7 ± 3.9	NA	NA	NA	NA	125 ± 20.5	119.3 ± 30.9	50.2 ± 9.9	50.5 ± 9.4	33.5 ± 21.7	42.2 ± 17.2	28.5 ± 15.9	28.1 ± 7.0	163.4 ± 75.7	161.7 ± 80.0	198.9 ± 26.6	190.3 ± 39.4	NOT AVALABLE	NA	NA	NA	NA	NA	NA	NA	NA	NA	NA	NA	NA	NA	NA	NA	NA	NA
Chiurazzi et al., 2022	doi.org/10.3390/nu14224750	59.8 ± 10.9	56.1 ± 9.9	RCT	32	36	placebo capsules	nutraceutical supplementation (Vitamin E, L-glutathione, silymarin andhepato-active compounds	nutraceutical		33.9 ± 6.6	36.7 ± 8.6	104.1 ± 11.3	110.0 ± 15.4	NA	NA	180.5 ± 41.2	204.3 ± 56.9	59.4 ± 19.6	40.9 ± 13.8	54.0 ± 21.1	53.8 ± 28.8	36.9 ± 13.0	38.5 ± 15.6	133.8 ± 53.0	159.4 ± 65.9	213.1 ± 42.3	207.9 ± 49.7	31.8 ± 5.7	34.0 ± 8.4	97.5 ± 11.0	103.7 ± 14.9	NA	NA	150.2 ± 31.7	143.0 ± 37.1	58.6 ± 11.6	42.9 ± 13.9	38.3 ± 10.6	29.4 ± 9.7	24.6 ± 17.4	25.0 ± 9.4	105.5 ± 35.4	122.9 ± 43.4	187.7 ± 36.0	161.4 ± 31.4
Cicero et al 2020	doi.org/10.1007/s00394-019-01916-7	53±5	54±3	RCT	40	40	placebo capsules	800 mg phytosomal curcumin	Curcumin	mean ± S	26.9±1.9	27.1±1.8	93±8	94±7	5.2±1.3	4.9±1.1	118±12	116±11	41±4	40±3					181±22	185±21	195±16	193±15	26.4±1.7	26.3±1.4	90±9	89±4	4.7±1.4	3.8±1.1	116±14	111±8	42±3	44±4	NA	NA	NA	NA	157±19	151±16*	189±19	185±13
Ebrahimi-Mameghani et al., 2016	http://dx.doi.org/10.1016/j.clnu.2016.07.004			RCT	26	29	four 300 mg tablets of placebos	four 300 mg tablets of C. vulgaris	C. vulgaris		NA	NA	108.92 ± 8.60	108.05 ± 10.01	2.52 ± 1.55	1.56 ± 1.04	NA	NA	NA	NA	46.65 ± 37.99	43.59 ± 22.80	32.81 ± 12.34	29.14 ± 12.19	NA	NA	NA	NA	NA	NA	105.28 ± 8.08	102.90 ± 11.34	3.39 ± 2.78	2.07 ± 1.11	NA	NA	NA	NA	39.73 ± 22.62	30.38 ± 18.32	28.12 ± 10.6	21.93 ± 9.01	NA	NA	NA	NA
Fateh et al., 2023	10.3389/fnut.2023.1181706	44.04±13.2	44.91±15.24	RCT	45	45	placebo capsules	250ml of beetroot juice	beetroot juice		28.62±3.84	28.01±2.55	92.33±4.89	91.72±6.99	NA	NA	147.1 ± 11.2	140.2 ± 9.2	30.9 ± 3.9	29.8 ± 3.9	44.50 ± 6.56	36.61 ± 5.87	63.85 ± 8.78	61.43 ± 8.85	173.8 ± 12.6	233.5 ± 14.1	224.6 ± 16.8	228.9 ± 6.2	27.82±3.36	26.46±2.56	91.54±4.89	90.17±6.69	NA	NA	135.7 ± 9.7	132.2 ± 5.8	28.8 ± 4.01	36.6 ± 4.2	44.50 ± 6.56	36.61 ± 5.87	61.11 ± 6.93	58.18 ± 6.33	175.7 ± 14.6	217.6 ± 11.6	221.1 ± 16.7	210.5 ± 3.7
Federica Fogacci et al. (2022)	https://doi.org/10.3390/ nu14102099	54 ± 3	54 ± 4	RCT	30	30	placebo_capsule	Eufortyn	Eufortyn		24.3 ± 3.9	23.9 ± 2.9	87.1 ± 14.0	85.8 ± 12.4			141.9 ± 20.1	143.3 ± 17.3	57.4 ± 17.6	64.9 ± 18.9	22.7 ± 14.4	19.2 ± 6.9	21.2 ± 7.2	22.3 ± 4.6	117.3 ± 70.2	109.7 ± 54.3	223.7 ± 24.7	229.2 ± 20.8	24.4 ± 3.7	23.7 ± 2.7	87.1 ± 13.8	84.8 ± 11.4			144.9 ± 20.2	131.2 ± 19.8	56.5 ± 14.9	61.8 ± 18.0	20.6 ± 10.3	19.0 ± 6.9	21.2 ± 4.6	22.8 ± 4.6	126.3 ± 59.5	112.9 ± 47.3	227.7 ± 22.3	214.5 ± 22.9
Federico et al., 2019	doi.org/10.1155/2019/8742075	47 ± 10	51 ± 6	RCT	30	60	No treament	silybin with vitamin D and vitamin E (RealSIL 100D)	Silybin		29.43 ± 4.65	28.92 ± 6.65	NA	NA	2.3±0.4	2.5±0.1	90 ± 16	95 ± 11			48 ± 16	45 ± 14	43 ± 10	44 ± 9	87 ± 13	87 ± 13	NA	NA	NA	NA	NA	NA	NA	NA	NA	NA	NA	NA	NA	NA	NA	NA	NA	NA	NA	NA
Ferro et al., 2022	10.1186/s12967-022-03579-1	54±8	54±10	RCT	70	70	maltodextrin	nutraceutical (namely Livogen Plus) containing a combination of natural bioactive components for 12 weeks	nutraceutical		29.3±3	28.7±4	NA	NA	2.95±2.2	2.82±1.7	NA	NA	50±11	52±12	26±23	23±15	22±11	21±8	118±51	137±83	191±33	204±31	29.1±4	28.0±4	NA	NA	2.8±1.7	2.4±1.3	NA	NA	52±12	52±12	24±18	24±13	20±10	21±6	121±57	133±92	192±31	210±39
Haidari et al. (2020)	https://doi.org/10.1016/j.nutres.2019.08.009	35.6±9.1	38.4±8.9	RCT	23	23	BCX placebo.	energy -restricted HPD supplemented with 6 mg/d of BCX	BCX		33.1±3.9	32.8±3.7	104.4±11.9	104.5±12.4	NA	NA	NA	NA	NA	NA	NA	NA	NA	NA	NA	NA	NA	NA	NA	NA	NA	NA	NA	NA	NA	NA	NA	NA	NA	NA	NA	NA	NA	NA	NA	NA
jarhahzadeh et al. (2021)	https://doi.org/10.1186/s13098-021-00731-7	38.56±10.43	44.12±8.35	RCT	32	32	placebo_capsule	Turmeric	Turmeric		30.15±5.10	29.51±4.96	105.69±15.06	104.72±10.71			116.52±27.11	121.93±28.77	42.45±10.17	40.28±6.66	35.42±18.51	39.56±22.41	27.29±11.53	26.81±10.54	176.44±91.96	164.34±80.12	194.50±34.29	195.88±35.38							104.60±22.99	108.40±26.83	44.59±7.17	42.34±4.13	39.50±21.15	30.51±12.61	25.26±9.66	21.19±5.67	155.62±85.35	141.78±65.57	182.62±29.36	186.50±36.49
Jinato et al. (2022)	https://doi.org/10.3390/ nu14142921	49.5 ± 13.8	50.8 ± 10.1	RCT	19	19	placebo_capsule	oligonol (100 mg capsule	Oligonol		27.9 ± 3.3	27.9 ± 2.6	95.1 ± 7.1	95.9 ± 6.8	2.4 ± 0.9	2.6 ± 3.0	126.2 ± 31.6	119.9 ± 27.1	46.5 ± 11.1	50.0 ± 11.8	53.6 ± 26.0	42.8 ± 17.5	34.4 ± 17.3	25.9 ± 5.1	133.3 ± 76.4	140.1 ± 70.8	190.1 ± 36.8	192.0 ± 31.7	27.5 ± 3.3	27.3 ± 2.6	93.7 ± 6.9	94.4 ± 6.8	3.1 ± 2.6	3.1 ± 2.2	122.3 ± 36.4	116.4 ± 29.2	44.7 ± 9.6	48.5 ± 10.6	46.7 ± 23.5	37.5 ± 14.0	31.1 ± 11.8	25.4 ± 7.1	149.0 ± 90.0	146.0 ± 121.0	194.3 ± 42.7	185.0 ± 35.8
José Illnait et al., 2013)	http://dx.doi.org/10.3904/kjim.2013.28.4.439	54 ± 10	55 ± 10	RCT	25	25	placebo_capsule	D- 002	D- 002		28.3 ± 4.4	27.8 ± 5.7	NA	NA	NA	NA	3.75 ± 1.12	3.75 ± 0.97	1.07 ± 0.35	1.08 ± 0.28	34.24 ± 12.16	31.52 ± 15.28	27.88 ± 7.41	27.20 ± 8.81	2.25 ± 1.25	2.26 ± 0.94	5.66 ± 1.13	5.67 ± 0.86							3.85 ± 1.27	3.65 ± 0.98	1.08 ± 0.36	1.08 ± 0.28	32.84 ± 20.06	31.16 ± 12.84	26.92 ± 7.45	29.44 ± 9.41	2.22 ± 1.52	1.99 ± 1.16	5.68 ± 1.38	5.40 ± 1.39
Mirhafez et al 2019	DOI: http://dx.doi.org/10.15403/jgld-179	40.7 (11.83)	44.8 (11.14)	RCT	32	33	placebo capsules	50 mg/day pure curcumin)	Curcumin	mean ± S	27.72 (5.97)	30.06 (5.76)	NA	NA	NA	NA	108.71 (24.14)	138.40 (40.39)	45.00 (10.55)	41.43 (13.86)	40.07 (19.82)	47.66 (35.20)	25.18 (11.11)	32.45 (18.60)	139.19 (58.51)	130.46 (87.27)	183.64 (29.14)	204.21 (37.68)	28.78 (4.22)	29.75 (5.84)	NA	NA	NA	NA	119.73 (24.60)	130.98 (42.75)	42.41 (10.59)	41.93 (13.93)	41.29 (19.29)	41.54 (22.98)	27.62 (9.89)	30.45 (15.61)	140.53 (66.39)	130.37 (83.68)	187.76 (31.34)	195.12 (40.61)
Mojiri-Forushani et al., 2022	https://doi.org/10.5812/hepatmon-132309	36.04 ± 9.40	37.71 ± 9.39	RCT	45	45	placebo (200 mg starch).	Grape seed extract capsules (200 mg, two times a day for 2 months	Grape Seed Extract Capsules		28.36 ± 1.75	28.08 ± 2.50	NA	NA	NA	NA	132 (118.5 - 141)	125 (120 - 137.5)	85 (77 - 87)	87 (78 - 88)	53 (47 - 60.5)	53 (50 - 59)	55 (45.5 - 65.5)	52 (46.5 - 68)	247 (215 - 277.5)	231 (215.5 - 279)	188 (180 - 210)	187 (173 - 214)	28.42 ± 1.76	28.01 ± 2.45	NA	NA	NA	NA	134 (118.5 - 141.5)	112 (109 - 119)	87 (78 - 88)	87 (78.5 - 88)	56 (51 - 62)	41 (39.5 - 43.5	58 (46.5 - 68)	40 (38 - 51)	257 (218 - 281)	201 (188.5 - 222.5)	190 (183 - 210)	158 (153 - 180.5)
Navarro et al. (2019)	https://doi.org/ 10.1371/journal.pone.0221683	49.5 (10.9)	48.2 (11.4)	RCT	25	53	placebo capsule	Legalon1 700 mg	Legalon		33.4 (4.8)	33.5 (4.3)			5.5(3.1,9.1)	4.5(2.9,9.0)	NA	NA	NA	NA	65(45,108)	61(51,94)	51(37,62)	46(36,58)	153(114,179)	153(101,197)	174 (38)	175 (36)
Pervez et al. (2022)	https://doi.org/10.3390/ijms24010079	47.28 ± 8.36	48.04 ± 7.66	RCT	50	50	delta-tocotrienol (δT3	alpha-tocopherol (αTF)	Alpha-Tocopherol		NA	NA	NA	NA	NA	NA	NA	NA	NA	NA	NA	NA	NA	NA	NA	NA	NA	NA	NA	NA	NA	NA	NA	NA	NA	NA	NA	NA	NA	NA	NA	NA	NA	NA	NA	NA
PothulaRajendra et al., 2022	10.31989/ffhd.v12i7.958	36.6 ± 7.5	40.2 ± 10.1	RCT	30	30	placebo capsules	320 mg Silymarin	Silymarin		26.5 ± 1.5	27.1 ± 1.6	91.12 ± 8.52	94.30 ± 7.55	2.20 ± 0.73	2.20 ± 0.93	107.53 ± 21.49	113.41 ± 27.42	40.63 ± 4.21	40.72 ± 5.61	15.40 ± 7.90	16.07 ± 7.19	22.53 ± 5.70	25.59 ± 8.38	145.23 ± 52.74	128.17 ± 38.02	176.83 ± 24.08	179.77 ± 30.20	NA	NA	NA	NA	2.09 ± 0.51	2.01 ± 0.47	108.53 ± 27.92	102.24 ± 22.86	41.87 ± 3.18	41.62 ± 5.21	19.03 ± 7.05	14.86 ± 4.62	25.70 ± 7.56	24.38 ± 4.77	155.27 ± 63.93	124.31 ± 32.46	182.33 ± 36.84	168.72 ± 26.24
Rajendra et al. (2022)	10.31989/ffhd.v12i7.958	36.6 ± 7.5	36.9 ± 9.2	RCT	30	30	placebo capsule	300 mg CL16049F1	CL16049F1		26.5 ± 1.5	27.1 ± 1.6	91.12 ± 8.52	91.67 ± 8.68	2.20 ± 0.73	2.34 ± 1.04	107.53 ± 21.49	112.10 ± 30.37	40.63 ± 4.21	40.97 ± 7.56	15.40 ± 7.90	17.79 ± 8.78	22.53 ± 5.70	25.66 ± 8.26	155.27 ± 63.93	131.72 ± 33.28	176.83 ± 24.08	181.48 ± 33.30					2.09 ± 0.51	1.95 ± 0.48	108.53 ± 27.92	93.90 ± 9.99	41.87 ± 3.18	43.45 ± 4.13	19.03 ± 7.05	15.24 ± 5.15	25.70 ± 7.56	22.00 ± 5.63	155.27 ± 63.93	131.72 ± 33.28	182.33 ± 36.84	163.69 ± 12.66
Rashidmayvan et al. (2019)	https://doi.org/10.1007/s40200-019-00439-6	42.22 ± 8.85	39 ± 5.37	RCT	22	22	1 g of paraffin oil	1 g of NS oil	NS oil		27.67 ± 4.37	27.59 ± 2.83	96.18 ± 12.96	90.86 ± 9.38			123.22 ± 15.90	131.18 ± 32.74	37.45 ± 4.74	34.54 ± 7.55	28.27 ± 2.84	29.77 ± 3.39	49.54 ± 4.75	52.50 ± 9.49	137.31 ± 25.48	158.55 ± 73.01	191.45 ± 19.06	204.27 ± 30.54	27.53 ± 4.33	27.51 ± 2.83	96.77 ± 12.68	90.70 ± 9.17			122.00 ± 16.66	107.81 ± 26.67	38.09 ± 6.43	45.13 ± 4.63	28.04 ± 7.26	24.18 ± 3.48	48.54 ± 5.69	36.90 ± 12.72	135.95 ± 34.26	129.09 ± 56.61	192.22 ± 22.20	176.27 ± 27.84
Saadati et al 2019	doi.org/10.1186/s12876-019-1055-4	10.9 ± 45.13	11.5 ± 46.19	RCT	23	25	lifestyle modification	1.5 g/d curcumin	Curcumin	mean ± S	32.38 ± 5.02	32.30 ± 4.55	103.28 ± 8.83	102.19 ± 8.78	NA	NA	NA	NA	NA	NA	28.02 ± 13.06	26.54 ± 15.46	16.23 ± 5.66	17.78 ± 9.56	NA	NA	NA	NA	NA	NA	NA	NA	NA	NA					21.2 ± 7.72	20.82 ± 10.09	14.75 ± 7.45	12.77 ± 4.05	NA	NA	NA	NA
Safari et al 2023	10.3389/fnut.2023.1163950	50.35 ± 9.44	43.92 ± 8.74	RCT	28	28	placebo capsules	Curcumin (250 mg per day)	Curcumin	mean ± S	29.28 ± 3.30	28.95 ± 3.24	103.64 ± 7.44	104.98 ± 7.20	NA	NA	105.59 ± 37.64	102.02 ± 32.23	46.67 ± 10.01	46.03 ± 10.00	34.71 ± 18.43	40.03 ± 24.51	32.92 ± 13.27	34.50 ± 13.57	189.96 ± 76.83	199.07 ± 87.13	193.57 ± 36.42	187.85 ± 37.46	29.14 ± 3.42	28.36 ± 2.93	104.19 ± 7.18	101.67 ± 6.74	NA	NA	115.07 ± 41.48	100.25 ± 36.61	48.25 ± 11.88	48.92 ± 12.61	30.37 ± 13.63	34.35 ± 16.33	31.25 ± 8.59	31.89 ± 9.58	162.92 ± 72.51	186.03 ± 68.38	194.94 ± 40.91	184.35 ± 33.23
Seyed Mohammad Mazloomi et al. (2021)	DOI: 10.1002/fsn3.2368	35.78 ± 11.14	38.87 ± 14.61	RCT	19	20	placebo_capsule	2 gr Spirulina per day	Spirulina		25.41 ± 3.45	24.67 ± 2.75	95.21 ± 7.10	93.78 ± 6.29	1.59 ± 0.66	1.90 ± 0.82	117.70 ± 40.62	126.96 ± 45.18	37.61 ± 11.27	42.43 ± 8.28	37.47 ± 4.37	38.86 ± 4.09	21.78 ± 2.66	23.13 ± 2.71	152.83 ± 21.12	165.30 ± 41.20	185.96 ± 39.90	202.48 ± 45	25.10 ± 2.52	24.60 ± 2.88	94.63 ± 5.02	93.10 ± 5.11	1.75 ± 0.50	1.63 ± 0.56	123.53 ± 23.76	116.60 ± 41.76	38.58 ± 10.65	46.40 ± 11.64	36.26 ± 4.42	33.25 ± 4.52	21.30 ± 3.67	18.95 ± 2.72	164.89 ± 38.82	138.65 ± 41.70	195.11 ± 24.86	186.75 ± 49.86
Šmíd et al. (2022)	doi/10.1002/hep4.1906/suppinfo.	52.1 ± 12	51.8 ± 12	RCT	30	30	placebo_capsule	n-3-PUFAs	n-3-PUFAs		32.7 ± 4.6	30.0 ± 3.3	109.2 ± 9.9	106.6 ± 8.8			2.62 ± 0.7	2.91 ± 1.1	1.35 ± 0.3	1.32 ± 0.3	0.99 ± 0.4	0.98 ± 0.5	0.70 ± 0.2	0.69 ± 0.3	1.9 ± 0.9	2.08 ± 1.6	4.86 ± 1	5.06 ± 1.2	33.1 ± 5.3	30.8 ± 4.9	109.7 ± 10.1	105.3 ± 9.0			2.58 ± 0.8	3.14 ± 1.1	1.36 ± 0 4	1.21 ± 0.3	0.94 ± 0.5	0.94 ± 0.4	0.66 ± 0.2	0.66 ± 0.2	1.86 ± 0.8	2.03 ± 1.5	4.78 ± 0.8	5.21 ± 1.0
Theodotou et al. (2019)	10.3892/etm.2019.7607	29-70	29-70	RCT	22	22	micronized trans-Resveratrol 50 mg (Evelor)	micronized trans-Resveratrol 200 mg (Evelor H)	Resveratrol		27.01	NA	NA	NA	NA	NA	119.45	116.19	48.6	47.67	NA	NA	NA	NA	132.5	109.76	194.5	185.67	27.93	NA	NA	NA	NA	NA	118.75	105.95	41.14	41.7	NA	NA	NA	NA	205.13	167.8	194.27	181.15

## Sheet: FBS Distribution
Row Labels	Count of Intervention				FBS	Count of FBS
Alpha-Tocopherol	1				Curcumin	4
Artemisia	1				Resveratrol	4
BCX	1				Silymarin	3
beetroot juice	1				nutraceutical	2
Berberis Integerrima	1				Silybin	2
C. vulgaris	1				Alpha-Tocopherol	1
CL16049F1	1				Artemisia	1
Curcumin	4				BCX	1
D- 002	1				beetroot juice	1
Eufortyn	1				Berberis Integerrima	1
fucoidan-fucoxanthin	1				C. vulgaris	1
Grape Seed Extract Capsules	1				CL16049F1	1
Legalon	1				D- 002	1
Mastiha	1				Eufortyn	1
n-3-PUFAs	1				fucoidan-fucoxanthin	1
NS oil	1				Grape Seed Extract	1
nutraceutical	2				Legalon	1
Oligonol	1				Mastiha	1
Resveratrol	4				n-3-PUFAs	1
Silybin	2				NS oil	1
Silymarin	3				Oligonol	1
Spirulina	1				Spirulina	1
Turmeric	1				Turmeric	1
Grand Total	33

## Sheet: For Meta-Analysis
											BASELINE PARAMETERS																		POST TREATMENT PARAMETERS
Study	DOI	Age_Placebo	Age_Treatment	Type of Study	Placebo (n)	Treatment (n)	ChemX_Placebo	ChemX_Treatment	Intervention		Resp_BMI (Placebo)	Resp_BMI (treatment)	Resp_WC (Placebo)	Resp_WC (treatment)	Resp_HOMA-IR (Placebo)	Resp_HOMA-IR (treatment)	Resp_LDL (Placebo)	Resp_LDL (treatment)	Resp_HDL (Placebo)	Resp_HDL (treatment)	Resp_ALT (Placebo)	Resp_ALT (treatment)	Resp_AST (Placebo)	Resp_AST (treatment)	Resp_TLG (Placebo)	Resp_TLG (treatment)	Resp_TChol (Placebo)	Resp_TChol (treatment)	Resp_BMI (Placebo)	Resp_BMI (treatment)	Resp_WC (Placebo)	Resp_WC (treatment)	Resp_HOMA-IR (Placebo)	Resp_HOMA-IR (treatment)	Resp_LDL (Placebo)	Resp_LDL (treatment)	Resp_HDL (Placebo)	Resp_HDL (treatment)	Resp_ALT (Placebo)	Resp_ALT (treatment)	Resp_AST (Placebo)	Resp_AST (treatment)	Resp_TLG (Placebo)	Resp_TLG (treatment)	Resp_TChol (Placebo)	Resp_TChol (treatment)
Safari et al 2023	10.3389/fnut.2023.1163950	50.35 ± 9.44	43.92 ± 8.74	RCT	28	28	placebo capsules	Curcumin (250 mg per day)	Curcumin	mean ± S	29.28 ± 3.30	28.95 ± 3.24	103.64 ± 7.44	104.98 ± 7.20	-	-	105.59 ± 37.64	102.02 ± 32.23	46.67 ± 10.01	46.03 ± 10.00	34.71 ± 18.43	40.03 ± 24.51	32.92 ± 13.27	34.50 ± 13.57	189.96 ± 76.83	199.07 ± 87.13	193.57 ± 36.42	187.85 ± 37.46	29.14 ± 3.42	28.36 ± 2.93	104.19 ± 7.18	101.67 ± 6.74	-	-	115.07 ± 41.48	100.25 ± 36.61	48.25 ± 11.88	48.92 ± 12.61	30.37 ± 13.63	34.35 ± 16.33	31.25 ± 8.59	31.89 ± 9.58	162.92 ± 72.51	186.03 ± 68.38	194.94 ± 40.91	184.35 ± 33.23
Cicero et al 2020	doi.org/10.1007/s00394-019-01916-7	53±5	54±3	RCT	40	40	placebo capsules	800 mg phytosomal curcumin	Curcumin	mean ± S	26.9±1.9	27.1±1.8	93±8	94±7	5.2±1.3	4.9±1.1	118±12	116±11	41±4	40±3					181±22	185±21	195±16	193±15	26.4±1.7	26.3±1.4	90±9	89±4	4.7±1.4	3.8±1.1	116±14	111±8	42±3	44±4	-	-	-	-	157±19	151±16*	189±19	185±13
Mirhafez et al 2019	DOI: http://dx.doi.org/10.15403/jgld-179	40.7 (11.83)	44.8 (11.14)	RCT	32	33	placebo capsules	50 mg/day pure curcumin)	Curcumin	mean ± S	27.72 (5.97)	30.06 (5.76)	-	-	-	-	108.71 (24.14)	138.40 (40.39)	45.00 (10.55)	41.43 (13.86)	40.07 (19.82)	47.66 (35.20)	25.18 (11.11)	32.45 (18.60)	139.19 (58.51)	130.46 (87.27)	183.64 (29.14)	204.21 (37.68)	28.78 (4.22)	29.75 (5.84)	-	-	-	-	119.73 (24.60)	130.98 (42.75)	42.41 (10.59)	41.93 (13.93)	41.29 (19.29)	41.54 (22.98)	27.62 (9.89)	30.45 (15.61)	140.53 (66.39)	130.37 (83.68)	187.76 (31.34)	195.12 (40.61)
Chen et al 2015	http://dx.doi.org/10.1016/j.dld.2014.11.015	43.5 ± 11	45.2 ± 10	RCT	30	30	2 placebo capsules	Two 150 mg resveratrol capsules	Resveratrol		26.2 ± 3.08	25.3 ± 2.11	88.2 ± 7.10	88.4 ± 7.01	3.16 ± 1.22	3.26 ± 1.36	2.95±0.68mmol/L	3.08±0.48mmol/L	1.26±0.25mmol/L	1.26±0.22mmol/L	34.5 (27.8, 47.0)	39 (33.8, 49.3)	27.5 (24.8, 33.0)	29.0 (26.0, 33.5)	-	-	5.39±0.78mmol/L	5.39±0.75mmol/L	0.17±0.86	"-" 0.01 ± 0.54	0.35±4.99	1.18±4.76	0.09 ± 1.37	"-"0.6 ± 1.15	0.08±0.71mmol/L	-' 0.41±0.35mmol/L	-' 0.02±0.41mmol/L	0.04±0.36mmol/L	"-"1 (-8.00, 4.50)	"-"7 (-11.00, 2.50)	"-"0.5 (-4.50, 2.25)	"-"6 (-9, -3)	-	-	"-"0.15 ± 0.77mmol/L	"-"0.67 ± 0.50mmol/L
Asghari et al., 2018	ttps://doi.org/10.1080/07315724.2017.1392264	39.27 (5.51)	39.80 (7.74)	RCT	30	30	2 placebo capsules	600 mg pure trans-resveratrol	Resveratrol	mean ± S	30.41 (3.39)	30.78 (3.10)	101.88 (8.18)	102.78 (7.57)	1.27 (0.04, 4.25)	1.38 (0.04, 6.77)	135.75 (31.42)	137.59 (36.42)	39.69 (6.78)	37.60 (9.72)	33.71 (20.36)	41.48 (23.60)	29.85 (9.80)	31.04 (11.12)	159.98 (86.91)	172.44 (95.52)	207.44 (36.62)	209.68 (41.58)	30.40 (3.33)	30.44 (3.14)	101.10 (8.21)	101.64 (7.82)	1.40 (0.04, 14.44)	1.11 (0.04, 8.34)	139.41 (32.12)	144.60 (35.23)	37.69 (8.55)	37.12 (11.28)	40.94 (28.81)	46.20 (25.19)	34.27 (21.06)	32.52 (11.19)	171.46 (97.38)	179.16 (111.38)	211.39 (34.48)	217.56 (40.40)
Anushiravani et al., 2019	DOI: 10.1097/MEG.0000000000001369	-	-	RCT	30	30	Lifestyle plus placebo	silymarin 140 mg/day	Silymarin		26.1 ± 3.1	25.1 ± 3.7	92.8 ± 8.9	90.6 ± 10.5	-	-	131.2 ± 48.8	113.7 ± 34.3	58.4 ± 8.6	48.5 ± 9.1	22.8 ± 15.9	30.2 ± 18.1	19.6 ± 11.7	23.3 ± 11.1	150.2 ± 54.2	155.1 ± 83.7	219.6 ± 55.4	193.2 ± 39.9	25.4 ± 2.6	24.4 ± 3.2	91.6 ± 8.2	89.8 ± 9.7	-	-	130.6 ± 37.3	112.5 ± 33.7	58.1 ± 6.3	49.4 ± 8.1	22.2 ± 12.8	21.6 ± 11.7	18.7 ± 9.4	16.6 ± 6.1	143.7 ± 41.8	144.8 ± 65.6	212.6 ± 47.9	191.2 ± 38.1
Chan et al., 2017	10.1016/j.cgh.2017.04.016	50.1 ± 10.2	49.6 ± 12.7	RCT	49	50	placebo capsules	silymarin (700 mg)	Silymarin		31.0 ± 4.6	30.0 ± 4.0	101 ± 11	99 ± 11	6.3 (4.3 – 10.0)	5.8 (3.6 – 10.0)	2.81 (2.34 – 3.57)	3.15 (2.48 – 4.08)	1.13 (0.96 – 1.36)	1.18 (0.99 – 1.34)	73 (47 – 121)	88 (60 – 132)	46 (31 – 70)	52 (36 – 78)	1.30 (1.10 – 1.93) mmol/L	1.70 (1.50 – 2.10) mmol/L	4.60 (4.18 – 5.43 mmol/L	5.10 (4.60 – 6.05) mmol/L	-	-	-	-	0.6	0.5	-0.17	-0.31	0.02	0.07	-21	-20	-6	-13	0.04	-'0.2	-0.09	-0.33
PothulaRajendra et al., 2022	10.31989/ffhd.v12i7.958	36.6 ± 7.5	40.2 ± 10.1	RCT	30	30	placebo capsules	320 mg Silymarin	Silymarin		26.5 ± 1.5	27.1 ± 1.6	91.12 ± 8.52	94.30 ± 7.55	2.20 ± 0.73	2.20 ± 0.93	107.53 ± 21.49	113.41 ± 27.42	40.63 ± 4.21	40.72 ± 5.61	15.40 ± 7.90	16.07 ± 7.19	22.53 ± 5.70	25.59 ± 8.38	145.23 ± 52.74	128.17 ± 38.02	176.83 ± 24.08	179.77 ± 30.20	-	-	-	-	2.09 ± 0.51	2.01 ± 0.47	108.53 ± 27.92	102.24 ± 22.86	41.87 ± 3.18	41.62 ± 5.21	19.03 ± 7.05	14.86 ± 4.62	25.70 ± 7.56	24.38 ± 4.77	155.27 ± 63.93	124.31 ± 32.46	182.33 ± 36.84	168.72 ± 26.24

## Sheet: ROugh
Study	DOI	Age_Placebo	Age_Treatment	Type of Study	Placebo (n)	Treatment (n)	ChemX_Placebo	ChemX_Treatment	Intervention	Resp_BMI (Placebo)	Resp_BMI (treatment)	Resp_WC (Placebo)	Resp_WC (treatment)	Resp_HOMA-IR (Placebo)	Resp_HOMA-IR (treatment)	Resp_LDL (Placebo)	Resp_LDL (treatment)	Resp_HDL (Placebo)	Resp_HDL (treatment)	Resp_ALT (Placebo)	Resp_ALT (treatment)	Resp_AST (Placebo)	Resp_AST (treatment)	Resp_TLG (Placebo)	Resp_TLG (treatment)	Resp_TChol (Placebo)	Resp_TChol (treatment)	Resp_BMI (Placebo)	Resp_BMI (treatment)	Resp_WC (Placebo)	Resp_WC (treatment)	Resp_HOMA-IR (Placebo)	Resp_HOMA-IR (treatment)	Resp_LDL (Placebo)	Resp_LDL (treatment)	Resp_HDL (Placebo)	Resp_HDL (treatment)	Resp_ALT (Placebo)	Resp_ALT (treatment)	Resp_AST (Placebo)	Resp_AST (treatment)	Resp_TLG (Placebo)	Resp_TLG (treatment)	Resp_TChol (Placebo)	Resp_TChol (treatment)
Ebrahimi-Mameghani et al., 2016	http://dx.doi.org/10.1016/j.clnu.2016.07.004			RCT	26	29	four 300 mg tablets of placebos	four 300 mg tablets of C. vulgaris	C. vulgaris	NA	NA	108.92 ± 8.60	108.05 ± 10.01	2.52 ± 1.55	1.56 ± 1.04	NA	NA	NA	NA	46.65 ± 37.99	43.59 ± 22.80	32.81 ± 12.34	29.14 ± 12.19	NA	NA	NA	NA	NA	NA	105.28 ± 8.08	102.90 ± 11.34	3.39 ± 2.78	2.07 ± 1.11	NA	NA	NA	NA	39.73 ± 22.62	30.38 ± 18.32	28.12 ± 10.6	21.93 ± 9.01	NA	NA	NA	NA
Safari et al 2023	10.3389/fnut.2023.1163950	50.35 ± 9.44	43.92 ± 8.74	RCT	28	28	placebo capsules	Curcumin (250 mg per day)	Curcumin	29.28 ± 3.30	28.95 ± 3.24	103.64 ± 7.44	104.98 ± 7.20	NA	NA	105.59 ± 37.64	102.02 ± 32.23	46.67 ± 10.01	46.03 ± 10.00	34.71 ± 18.43	40.03 ± 24.51	32.92 ± 13.27	34.50 ± 13.57	189.96 ± 76.83	199.07 ± 87.13	193.57 ± 36.42	187.85 ± 37.46	29.14 ± 3.42	28.36 ± 2.93	104.19 ± 7.18	101.67 ± 6.74	NA	NA	115.07 ± 41.48	100.25 ± 36.61	48.25 ± 11.88	48.92 ± 12.61	30.37 ± 13.63	34.35 ± 16.33	31.25 ± 8.59	31.89 ± 9.58	162.92 ± 72.51	186.03 ± 68.38	194.94 ± 40.91	184.35 ± 33.23
Cicero et al 2020	doi.org/10.1007/s00394-019-01916-7	53±5	54±3	RCT	40	40	placebo capsules	800 mg phytosomal curcumin	Curcumin	26.9±1.9	27.1±1.8	93±8	94±7	5.2±1.3	4.9±1.1	118±12	116±11	41±4	40±3					181±22	185±21	195±16	193±15	26.4±1.7	26.3±1.4	90±9	89±4	4.7±1.4	3.8±1.1	116±14	111±8	42±3	44±4	NA	NA	NA	NA	157±19	151±16*	189±19	185±13
Mirhafez et al 2019	DOI: http://dx.doi.org/10.15403/jgld-179	40.7 (11.83)	44.8 (11.14)	RCT	32	33	placebo capsules	50 mg/day pure curcumin)	Curcumin	27.72 (5.97)	30.06 (5.76)	NA	NA	NA	NA	108.71 (24.14)	138.40 (40.39)	45.00 (10.55)	41.43 (13.86)	40.07 (19.82)	47.66 (35.20)	25.18 (11.11)	32.45 (18.60)	139.19 (58.51)	130.46 (87.27)	183.64 (29.14)	204.21 (37.68)	28.78 (4.22)	29.75 (5.84)	NA	NA	NA	NA	119.73 (24.60)	130.98 (42.75)	42.41 (10.59)	41.93 (13.93)	41.29 (19.29)	41.54 (22.98)	27.62 (9.89)	30.45 (15.61)	140.53 (66.39)	130.37 (83.68)	187.76 (31.34)	195.12 (40.61)
Saadati et al 2019	doi.org/10.1186/s12876-019-1055-4	10.9 ± 45.13	11.5 ± 46.19	RCT	23	25	lifestyle modification	1.5 g/d curcumin	Curcumin	32.38 ± 5.02	32.30 ± 4.55	103.28 ± 8.83	102.19 ± 8.78	NA	NA	NA	NA	NA	NA	28.02 ± 13.06	26.54 ± 15.46	16.23 ± 5.66	17.78 ± 9.56	NA	NA	NA	NA	NA	NA	NA	NA	NA	NA					21.2 ± 7.72	20.82 ± 10.09	14.75 ± 7.45	12.77 ± 4.05	NA	NA	NA	NA
Chen et al 2015	http://dx.doi.org/10.1016/j.dld.2014.11.015	43.5 ± 11	45.2 ± 10	RCT	30	30	2 placebo capsules	Two 150 mg resveratrol capsules	Resveratrol	26.2 ± 3.08	25.3 ± 2.11	88.2 ± 7.10	88.4 ± 7.01	3.16 ± 1.22	3.26 ± 1.36	2.95±0.68mmol/L	3.08±0.48mmol/L	1.26±0.25mmol/L	1.26±0.22mmol/L	34.5 (27.8, 47.0)	39 (33.8, 49.3)	27.5 (24.8, 33.0)	29.0 (26.0, 33.5)	NA	NA	5.39±0.78mmol/L	5.39±0.75mmol/L	0.17±0.86	"-" 0.01 ± 0.54	0.35±4.99	1.18±4.76	0.09 ± 1.37	"-"0.6 ± 1.15	0.08±0.71mmol/L	-' 0.41±0.35mmol/L	-' 0.02±0.41mmol/L	0.04±0.36mmol/L	"-"1 (-8.00, 4.50)	"-"7 (-11.00, 2.50)	"-"0.5 (-4.50, 2.25)	"-"6 (-9, -3)	NA	NA	"-"0.15 ± 0.77mmol/L	"-"0.67 ± 0.50mmol/L
Asghari et al., 2018	ttps://doi.org/10.1080/07315724.2017.1392264	39.27 (5.51)	39.80 (7.74)	RCT	30	30	2 placebo capsules	600 mg pure trans-resveratrol	Resveratrol	30.41 (3.39)	30.78 (3.10)	101.88 (8.18)	102.78 (7.57)	1.27 (0.04, 4.25)	1.38 (0.04, 6.77)	135.75 (31.42)	137.59 (36.42)	39.69 (6.78)	37.60 (9.72)	33.71 (20.36)	41.48 (23.60)	29.85 (9.80)	31.04 (11.12)	159.98 (86.91)	172.44 (95.52)	207.44 (36.62)	209.68 (41.58)	30.40 (3.33)	30.44 (3.14)	101.10 (8.21)	101.64 (7.82)	1.40 (0.04, 14.44)	1.11 (0.04, 8.34)	139.41 (32.12)	144.60 (35.23)	37.69 (8.55)	37.12 (11.28)	40.94 (28.81)	46.20 (25.19)	34.27 (21.06)	32.52 (11.19)	171.46 (97.38)	179.16 (111.38)	211.39 (34.48)	217.56 (40.40)
Abenavoli et al 2015	10.1586/17474124.2015.1004312	33 (28–44)	46 (36–59)	RCT	10	10	No treatment	silybin–vitamin E–phospholipidcomplex	Silybin	29 (27–32)	29 (28–32)	102 (97–111)	104 (100–105)	1.9 (1–3.3)	4 (3–6)	113 (96–130)	122 (97–134)	45 (36–53)	47 (35–52)	29 (23–61)	23 (21–40)	25 (22–32)	22 (20–25	136 (115–179)	103 (84–154)	170 (145–189)	198 (171–213)	29 (27–31)	27 (25–28)	102 (98–111)	98 (96–100)	2.6 (1.8–4)	2 (1–3)	67 (53–96)	95 (75–120)	46 (42–49)	38 (37–45)	40 (31–54)	25 (17–25)	29 (23–60)	21 (18–32)	142 (136–176)	65 (60–92)	194 (150–216)	152 (140–180)
Afsharinasab et al., 2020	https://doi.org/10.1016/j.sjbs.2020.04.037	34.9±8.69	33.52±6.67	RCT	21	21	Cellulose 750 mg	Extract of Berberis integerrima (750mg)	Berberis Integerrima	26.66±2.91	25.85±2.63	96.85 ± 8.36	93.41 ± 5.3	NA	NA	122.35 ± 21.73	133.05 ± 20.11	44.90 ± 4.62	46.38 ± 5.06	54.55 ± 9.81	54.52 ± 10.31	52.35 ± 9.89	52.95 ± 10.04	233.05 ± 61.74	224.43 ± 83.90	277.15 ± 48.54	250.19 ± 51.68	26.54 ± 2.82	25.48 ± 2.56	96.10 ± 8.25	91.57 ± 5.2	NA	NA	115.35 ± 20.47	12.33 ± 15.13	46.70 ± 10.86	54.81 ± 4.80	46.15 ± 7.31	39.38 ± 5.32	45.85 ± 7.74	37.81 ± 5.34	223.05 ± 48.01	194.62 ± 60.51	216.25 ± 41.7	205.62 ± 45.01
Amerikanou et al., 2021	DOI: 10.1002/mnfr.202001178	48.95 (9.04)	48.66 (9.89)	RCT	57	41	placebo capsules	Mastiha	Mastiha	34.66 (5.05)	34.14 (3.38)	NA	NA	4.83 (2.69)	4.95 (2.52)	129.69 (37.31)	123.65 (30.75)	44.31 (9.91)	44.75 (11.04)	36.7 (21.67)	39.33 (18.71)	24.39 (11.72)	26.59 (10.19)	141.96 59.35)	156.91 (72.15)	202.91 (37.61)	200.14 (37.59)	NA	NA	NA	NA	NA	NA	NA	NA	NA	NA	NA	NA	NA	NA	NA	NA	NA	NA
Anushiravani et al., 2019	DOI: 10.1097/MEG.0000000000001369	NA	NA	RCT	30	30	Lifestyle plus placebo	silymarin 140 mg/day	Silymarin	26.1 ± 3.1	25.1 ± 3.7	92.8 ± 8.9	90.6 ± 10.5	NA	NA	131.2 ± 48.8	113.7 ± 34.3	58.4 ± 8.6	48.5 ± 9.1	22.8 ± 15.9	30.2 ± 18.1	19.6 ± 11.7	23.3 ± 11.1	150.2 ± 54.2	155.1 ± 83.7	219.6 ± 55.4	193.2 ± 39.9	25.4 ± 2.6	24.4 ± 3.2	91.6 ± 8.2	89.8 ± 9.7	NA	NA	130.6 ± 37.3	112.5 ± 33.7	58.1 ± 6.3	49.4 ± 8.1	22.2 ± 12.8	21.6 ± 11.7	18.7 ± 9.4	16.6 ± 6.1	143.7 ± 41.8	144.8 ± 65.6	212.6 ± 47.9	191.2 ± 38.1
Asghari et al., 2018	doi: 10.15171/apb.2018.036	38.50 (30, 48)	40.00 (22, 58)	RCT	26	25	placebo capsules	2×300 mg pure trans-resveratrol capsules	Resveratrol	30.41 (3.39)	30.78 (3.10)	NA	NA	NA	NA	NA	NA	NA	NA	NA	NA	NA	NA	NA	NA	NA	NA	NA	NA	NA	NA	NA	NA	NA	NA	NA	NA	NA	NA	NA	NA	NA	NA	NA	NA
ByoungduckHAN et al., 2020	https://doi.org/10.7762/cnr.2020.9.4.258	49.20 ± 12.94	48.00 ± 12.63	RCT	41	38	placebo capsules	SPB-201 (powdered-water extract of Artemisia annua	Artemisia	27.53 ± 4.26	26.65 ± 3.87	NA	NA	NA	NA	NA	NA	NA	NA	NA	NA	NA	NA	NA	NA	NA	NA	NA	NA	NA	NA	NA	NA	0.02 ± 21.08 mg/dL	-'(6.03 ± 23.1)	NA	NA	-'(7.41 ± 15.90 U/L)	-'(15.97 ± 18.82 U/L)	-'(5.71 ± 12.71 U/L)	-'(11.39 ± 13.58 U/L)	NA	NA	NA	-'20%
Chan et al., 2017	10.1016/j.cgh.2017.04.016	50.1 ± 10.2	49.6 ± 12.7	RCT	49	50	placebo capsules	silymarin (700 mg)	Silymarin	31.0 ± 4.6	30.0 ± 4.0	101 ± 11	99 ± 11	6.3 (4.3 – 10.0)	5.8 (3.6 – 10.0)	2.81 (2.34 – 3.57)	3.15 (2.48 – 4.08)	1.13 (0.96 – 1.36)	1.18 (0.99 – 1.34)	73 (47 – 121)	88 (60 – 132)	46 (31 – 70)	52 (36 – 78)	1.30 (1.10 – 1.93) mmol/L	1.70 (1.50 – 2.10) mmol/L	4.60 (4.18 – 5.43 mmol/L	5.10 (4.60 – 6.05) mmol/L	NA	NA	NA	NA	0.6	0.5	-0.17	-0.31	0.02	0.07	-21	-20	-6	-13	0.04	-'0.2	-0.09	-0.33
Cheng et al., 2019	10.1002/aid2.13125	59 ± 10.5	55 ± 12.5	RCT	20	20	placebo capsules	fucoidan-fucoxanthin mixture (275 mg LMF and 275 mg HSFx)	fucoidan-fucoxanthin	27.5 ± 4.0	28.7 ± 3.9	NA	NA	NA	NA	125 ± 20.5	119.3 ± 30.9	50.2 ± 9.9	50.5 ± 9.4	33.5 ± 21.7	42.2 ± 17.2	28.5 ± 15.9	28.1 ± 7.0	163.4 ± 75.7	161.7 ± 80.0	198.9 ± 26.6	190.3 ± 39.4	NOT AVALABLE	NA	NA	NA	NA	NA	NA	NA	NA	NA	NA	NA	NA	NA	NA	NA	NA	NA
Mojiri-Forushani et al., 2022	https://doi.org/10.5812/hepatmon-132309	36.04 ± 9.40	37.71 ± 9.39	RCT	45	45	placebo (200 mg starch).	Grape seed extract capsules (200 mg, two times a day for 2 months	Grape Seed Extract Capsules	28.36 ± 1.75	28.08 ± 2.50	NA	NA	NA	NA	132 (118.5 - 141)	125 (120 - 137.5)	85 (77 - 87)	87 (78 - 88)	53 (47 - 60.5)	53 (50 - 59)	55 (45.5 - 65.5)	52 (46.5 - 68)	247 (215 - 277.5)	231 (215.5 - 279)	188 (180 - 210)	187 (173 - 214)	28.42 ± 1.76	28.01 ± 2.45	NA	NA	NA	NA	134 (118.5 - 141.5)	112 (109 - 119)	87 (78 - 88)	87 (78.5 - 88)	56 (51 - 62)	41 (39.5 - 43.5	58 (46.5 - 68)	40 (38 - 51)	257 (218 - 281)	201 (188.5 - 222.5)	190 (183 - 210)	158 (153 - 180.5)
Chiurazzi et al., 2022	doi.org/10.3390/nu14224750	59.8 ± 10.9	56.1 ± 9.9	RCT	32	36	placebo capsules	nutraceutical supplementation (Vitamin E, L-glutathione, silymarin andhepato-active compounds	nutraceutical	33.9 ± 6.6	36.7 ± 8.6	104.1 ± 11.3	110.0 ± 15.4	NA	NA	180.5 ± 41.2	204.3 ± 56.9	59.4 ± 19.6	40.9 ± 13.8	54.0 ± 21.1	53.8 ± 28.8	36.9 ± 13.0	38.5 ± 15.6	133.8 ± 53.0	159.4 ± 65.9	213.1 ± 42.3	207.9 ± 49.7	31.8 ± 5.7	34.0 ± 8.4	97.5 ± 11.0	103.7 ± 14.9	NA	NA	150.2 ± 31.7	143.0 ± 37.1	58.6 ± 11.6	42.9 ± 13.9	38.3 ± 10.6	29.4 ± 9.7	24.6 ± 17.4	25.0 ± 9.4	105.5 ± 35.4	122.9 ± 43.4	187.7 ± 36.0	161.4 ± 31.4
PothulaRajendra et al., 2022	10.31989/ffhd.v12i7.958	36.6 ± 7.5	40.2 ± 10.1	RCT	30	30	placebo capsules	320 mg Silymarin	Silymarin	26.5 ± 1.5	27.1 ± 1.6	91.12 ± 8.52	94.30 ± 7.55	2.20 ± 0.73	2.20 ± 0.93	107.53 ± 21.49	113.41 ± 27.42	40.63 ± 4.21	40.72 ± 5.61	15.40 ± 7.90	16.07 ± 7.19	22.53 ± 5.70	25.59 ± 8.38	145.23 ± 52.74	128.17 ± 38.02	176.83 ± 24.08	179.77 ± 30.20	NA	NA	NA	NA	2.09 ± 0.51	2.01 ± 0.47	108.53 ± 27.92	102.24 ± 22.86	41.87 ± 3.18	41.62 ± 5.21	19.03 ± 7.05	14.86 ± 4.62	25.70 ± 7.56	24.38 ± 4.77	155.27 ± 63.93	124.31 ± 32.46	182.33 ± 36.84	168.72 ± 26.24
Fateh et al., 2023	10.3389/fnut.2023.1181706	44.04±13.2	44.91±15.24	RCT	45	45	placebo capsules	250ml of beetroot juice	beetroot juice	28.62±3.84	28.01±2.55	92.33±4.89	91.72±6.99	NA	NA	147.1 ± 11.2	140.2 ± 9.2	30.9 ± 3.9	29.8 ± 3.9	44.50 ± 6.56	36.61 ± 5.87	63.85 ± 8.78	61.43 ± 8.85	173.8 ± 12.6	233.5 ± 14.1	224.6 ± 16.8	228.9 ± 6.2	27.82±3.36	26.46±2.56	91.54±4.89	90.17±6.69	NA	NA	135.7 ± 9.7	132.2 ± 5.8	28.8 ± 4.01	36.6 ± 4.2	44.50 ± 6.56	36.61 ± 5.87	61.11 ± 6.93	58.18 ± 6.33	175.7 ± 14.6	217.6 ± 11.6	221.1 ± 16.7	210.5 ± 3.7
Federico et al., 2019	doi.org/10.1155/2019/8742075	47 ± 10	51 ± 6	RCT	30	60	No treament	silybin with vitamin D and vitamin E (RealSIL 100D)	Silybin	29.43 ± 4.65	28.92 ± 6.65	NA	NA	2.3±0.4	2.5±0.1	90 ± 16	95 ± 11			48 ± 16	45 ± 14	43 ± 10	44 ± 9	87 ± 13	87 ± 13	NA	NA	NA	NA	NA	NA	NA	NA	NA	NA	NA	NA	NA	NA	NA	NA	NA	NA	NA	NA
Ferro et al., 2022	10.1186/s12967-022-03579-1	54±8	54±10	RCT	70	70	maltodextrin	nutraceutical (namely Livogen Plus) containing a combination of natural bioactive components for 12 weeks	nutraceutical	29.3±3	28.7±4	NA	NA	2.95±2.2	2.82±1.7	NA	NA	50±11	52±12	26±23	23±15	22±11	21±8	118±51	137±83	191±33	204±31	29.1±4	28.0±4	NA	NA	2.8±1.7	2.4±1.3	NA	NA	52±12	52±12	24±18	24±13	20±10	21±6	121±57	133±92	192±31	210±39
Theodotou et al. (2019)	10.3892/etm.2019.7607	29-70	29-70	RCT	22	22	micronized trans-Resveratrol 50 mg (Evelor)	micronized trans-Resveratrol 200 mg (Evelor H)	Resveratrol	27.01	NA	NA	NA	NA	NA	119.45	116.19	48.6	47.67	NA	NA	NA	NA	132.5	109.76	194.5	185.67	27.93	NA	NA	NA	NA	NA	118.75	105.95	41.14	41.7	NA	NA	NA	NA	205.13	167.8	194.27	181.15
Šmíd et al. (2022)	doi/10.1002/hep4.1906/suppinfo.	52.1 ± 12	51.8 ± 12	RCT	30	30	placebo_capsule	n-3-PUFAs	n-3-PUFAs	32.7 ± 4.6	30.0 ± 3.3	109.2 ± 9.9	106.6 ± 8.8			2.62 ± 0.7	2.91 ± 1.1	1.35 ± 0.3	1.32 ± 0.3	0.99 ± 0.4	0.98 ± 0.5	0.70 ± 0.2	0.69 ± 0.3	1.9 ± 0.9	2.08 ± 1.6	4.86 ± 1	5.06 ± 1.2	33.1 ± 5.3	30.8 ± 4.9	109.7 ± 10.1	105.3 ± 9.0			2.58 ± 0.8	3.14 ± 1.1	1.36 ± 0 4	1.21 ± 0.3	0.94 ± 0.5	0.94 ± 0.4	0.66 ± 0.2	0.66 ± 0.2	1.86 ± 0.8	2.03 ± 1.5	4.78 ± 0.8	5.21 ± 1.0
Rashidmayvan et al. (2019)	https://doi.org/10.1007/s40200-019-00439-6	42.22 ± 8.85	39 ± 5.37	RCT	22	22	1 g of paraffin oil	1 g of NS oil	NS oil	27.67 ± 4.37	27.59 ± 2.83	96.18 ± 12.96	90.86 ± 9.38			123.22 ± 15.90	131.18 ± 32.74	37.45 ± 4.74	34.54 ± 7.55	28.27 ± 2.84	29.77 ± 3.39	49.54 ± 4.75	52.50 ± 9.49	137.31 ± 25.48	158.55 ± 73.01	191.45 ± 19.06	204.27 ± 30.54	27.53 ± 4.33	27.51 ± 2.83	96.77 ± 12.68	90.70 ± 9.17			122.00 ± 16.66	107.81 ± 26.67	38.09 ± 6.43	45.13 ± 4.63	28.04 ± 7.26	24.18 ± 3.48	48.54 ± 5.69	36.90 ± 12.72	135.95 ± 34.26	129.09 ± 56.61	192.22 ± 22.20	176.27 ± 27.84
Rajendra et al. (2022)	10.31989/ffhd.v12i7.958	36.6 ± 7.5	36.9 ± 9.2	RCT	30	30	placebo capsule	300 mg CL16049F1	CL16049F1	26.5 ± 1.5	27.1 ± 1.6	91.12 ± 8.52	91.67 ± 8.68	2.20 ± 0.73	2.34 ± 1.04	107.53 ± 21.49	112.10 ± 30.37	40.63 ± 4.21	40.97 ± 7.56	15.40 ± 7.90	17.79 ± 8.78	22.53 ± 5.70	25.66 ± 8.26	155.27 ± 63.93	131.72 ± 33.28	176.83 ± 24.08	181.48 ± 33.30					2.09 ± 0.51	1.95 ± 0.48	108.53 ± 27.92	93.90 ± 9.99	41.87 ± 3.18	43.45 ± 4.13	19.03 ± 7.05	15.24 ± 5.15	25.70 ± 7.56	22.00 ± 5.63	155.27 ± 63.93	131.72 ± 33.28	182.33 ± 36.84	163.69 ± 12.66
Pervez et al. (2022)	https://doi.org/10.3390/ijms24010079	47.28 ± 8.36	48.04 ± 7.66	RCT	50	50	delta-tocotrienol (δT3	alpha-tocopherol (αTF)	Alpha-Tocopherol	NA	NA	NA	NA	NA	NA	NA	NA	NA	NA	NA	NA	NA	NA	NA	NA	NA	NA	NA	NA	NA	NA	NA	NA	NA	NA	NA	NA	NA	NA	NA	NA	NA	NA	NA	NA
Navarro et al. (2019)	https://doi.org/ 10.1371/journal.pone.0221683	49.5 (10.9)	48.2 (11.4)	RCT	25	53	placebo capsule	Legalon1 700 mg	Legalon	33.4 (4.8)	33.5 (4.3)			5.5(3.1,9.1)	4.5(2.9,9.0)	NA	NA	NA	NA	65(45,108)	61(51,94)	51(37,62)	46(36,58)	153(114,179)	153(101,197)	174 (38)	175 (36)
Seyed Mohammad Mazloomi et al. (2021)	DOI: 10.1002/fsn3.2368	35.78 ± 11.14	38.87 ± 14.61	RCT	19	20	placebo_capsule	2 gr Spirulina per day	Spirulina	25.41 ± 3.45	24.67 ± 2.75	95.21 ± 7.10	93.78 ± 6.29	1.59 ± 0.66	1.90 ± 0.82	117.70 ± 40.62	126.96 ± 45.18	37.61 ± 11.27	42.43 ± 8.28	37.47 ± 4.37	38.86 ± 4.09	21.78 ± 2.66	23.13 ± 2.71	152.83 ± 21.12	165.30 ± 41.20	185.96 ± 39.90	202.48 ± 45	25.10 ± 2.52	24.60 ± 2.88	94.63 ± 5.02	93.10 ± 5.11	1.75 ± 0.50	1.63 ± 0.56	123.53 ± 23.76	116.60 ± 41.76	38.58 ± 10.65	46.40 ± 11.64	36.26 ± 4.42	33.25 ± 4.52	21.30 ± 3.67	18.95 ± 2.72	164.89 ± 38.82	138.65 ± 41.70	195.11 ± 24.86	186.75 ± 49.86
Jinato et al. (2022)	https://doi.org/10.3390/ nu14142921	49.5 ± 13.8	50.8 ± 10.1	RCT	19	19	placebo_capsule	oligonol (100 mg capsule	Oligonol	27.9 ± 3.3	27.9 ± 2.6	95.1 ± 7.1	95.9 ± 6.8	2.4 ± 0.9	2.6 ± 3.0	126.2 ± 31.6	119.9 ± 27.1	46.5 ± 11.1	50.0 ± 11.8	53.6 ± 26.0	42.8 ± 17.5	34.4 ± 17.3	25.9 ± 5.1	133.3 ± 76.4	140.1 ± 70.8	190.1 ± 36.8	192.0 ± 31.7	27.5 ± 3.3	27.3 ± 2.6	93.7 ± 6.9	94.4 ± 6.8	3.1 ± 2.6	3.1 ± 2.2	122.3 ± 36.4	116.4 ± 29.2	44.7 ± 9.6	48.5 ± 10.6	46.7 ± 23.5	37.5 ± 14.0	31.1 ± 11.8	25.4 ± 7.1	149.0 ± 90.0	146.0 ± 121.0	194.3 ± 42.7	185.0 ± 35.8
jarhahzadeh et al. (2021)	https://doi.org/10.1186/s13098-021-00731-7	38.56±10.43	44.12±8.35	RCT	32	32	placebo_capsule	Turmeric	Turmeric	30.15±5.10	29.51±4.96	105.69±15.06	104.72±10.71			116.52±27.11	121.93±28.77	42.45±10.17	40.28±6.66	35.42±18.51	39.56±22.41	27.29±11.53	26.81±10.54	176.44±91.96	164.34±80.12	194.50±34.29	195.88±35.38							104.60±22.99	108.40±26.83	44.59±7.17	42.34±4.13	39.50±21.15	30.51±12.61	25.26±9.66	21.19±5.67	155.62±85.35	141.78±65.57	182.62±29.36	186.50±36.49
Haidari et al. (2020)	https://doi.org/10.1016/j.nutres.2019.08.009	35.6±9.1	38.4±8.9	RCT	23	23	BCX placebo.	energy -restricted HPD supplemented with 6 mg/d of BCX	BCX	33.1±3.9	32.8±3.7	104.4±11.9	104.5±12.4	NA	NA	NA	NA	NA	NA	NA	NA	NA	NA	NA	NA	NA	NA	NA	NA	NA	NA	NA	NA	NA	NA	NA	NA	NA	NA	NA	NA	NA	NA	NA	NA
Federica Fogacci et al. (2022)	https://doi.org/10.3390/ nu14102099	54 ± 3	54 ± 4	RCT	30	30	placebo_capsule	Eufortyn	Eufortyn	24.3 ± 3.9	23.9 ± 2.9	87.1 ± 14.0	85.8 ± 12.4			141.9 ± 20.1	143.3 ± 17.3	57.4 ± 17.6	64.9 ± 18.9	22.7 ± 14.4	19.2 ± 6.9	21.2 ± 7.2	22.3 ± 4.6	117.3 ± 70.2	109.7 ± 54.3	223.7 ± 24.7	229.2 ± 20.8	24.4 ± 3.7	23.7 ± 2.7	87.1 ± 13.8	84.8 ± 11.4			144.9 ± 20.2	131.2 ± 19.8	56.5 ± 14.9	61.8 ± 18.0	20.6 ± 10.3	19.0 ± 6.9	21.2 ± 4.6	22.8 ± 4.6	126.3 ± 59.5	112.9 ± 47.3	227.7 ± 22.3	214.5 ± 22.9
José Illnait et al., 2013)	http://dx.doi.org/10.3904/kjim.2013.28.4.439	54 ± 10	55 ± 10	RCT	25	25	placebo_capsule	D- 002	D- 002	28.3 ± 4.4	27.8 ± 5.7	NA	NA	NA	NA	3.75 ± 1.12	3.75 ± 0.97	1.07 ± 0.35	1.08 ± 0.28	34.24 ± 12.16	31.52 ± 15.28	27.88 ± 7.41	27.20 ± 8.81	2.25 ± 1.25	2.26 ± 0.94	5.66 ± 1.13	5.67 ± 0.86							3.85 ± 1.27	3.65 ± 0.98	1.08 ± 0.36	1.08 ± 0.28	32.84 ± 20.06	31.16 ± 12.84	26.92 ± 7.45	29.44 ± 9.41	2.22 ± 1.52	1.99 ± 1.16	5.68 ± 1.38	5.40 ± 1.39
